# Supplementary material for: HighResClimNevada: a high-resolution climatological dataset for a high-altitude region in southern Spain (Sierra Nevada)
Source: Copernicus journal article supplement (doi:10.5194/essd-17-2809-2025), 2025-06-24
Supplement: Supplementary file 1 [file essd-17-2809-2025-supplement.pdf]

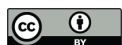

*Supplement of*

## **HighResClimNevada: a high-resolution climatological dataset for a high-altitude region in southern Spain (Sierra Nevada)**

**Matilde García-Valdecasas Ojeda et al.**

*Correspondence to:* Matilde García-Valdecasas Ojeda ([mgvaldecasas@ugr.es](mailto:mgvaldecasas@ugr.es))

The copyright of individual parts of the supplement might differ from the article licence.

## Supplementary figures

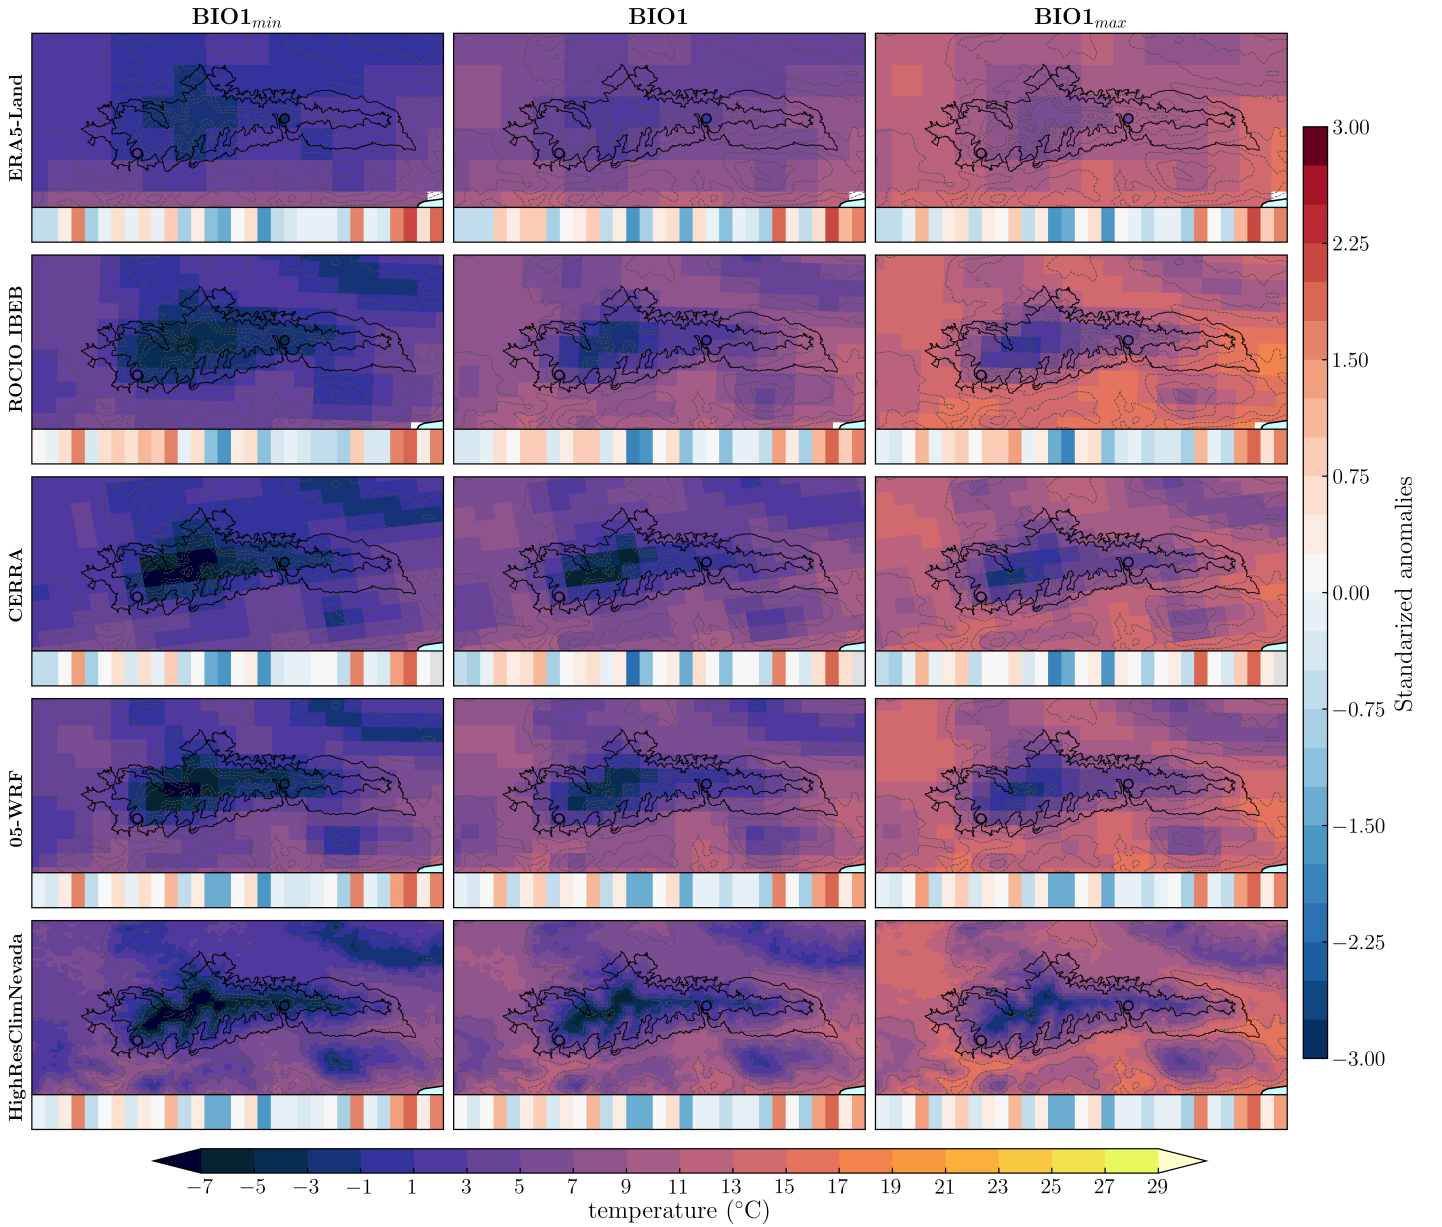

**Fig. S1** Winter (DJF) average of daily maximum (tasmax), mean (tasmean), and minimum (tasmin) temperatures. Below each panel, the annual temperature from 2001 to 2010 in Sierra Nevada is shown as standardized anomalies over 2001-2020.

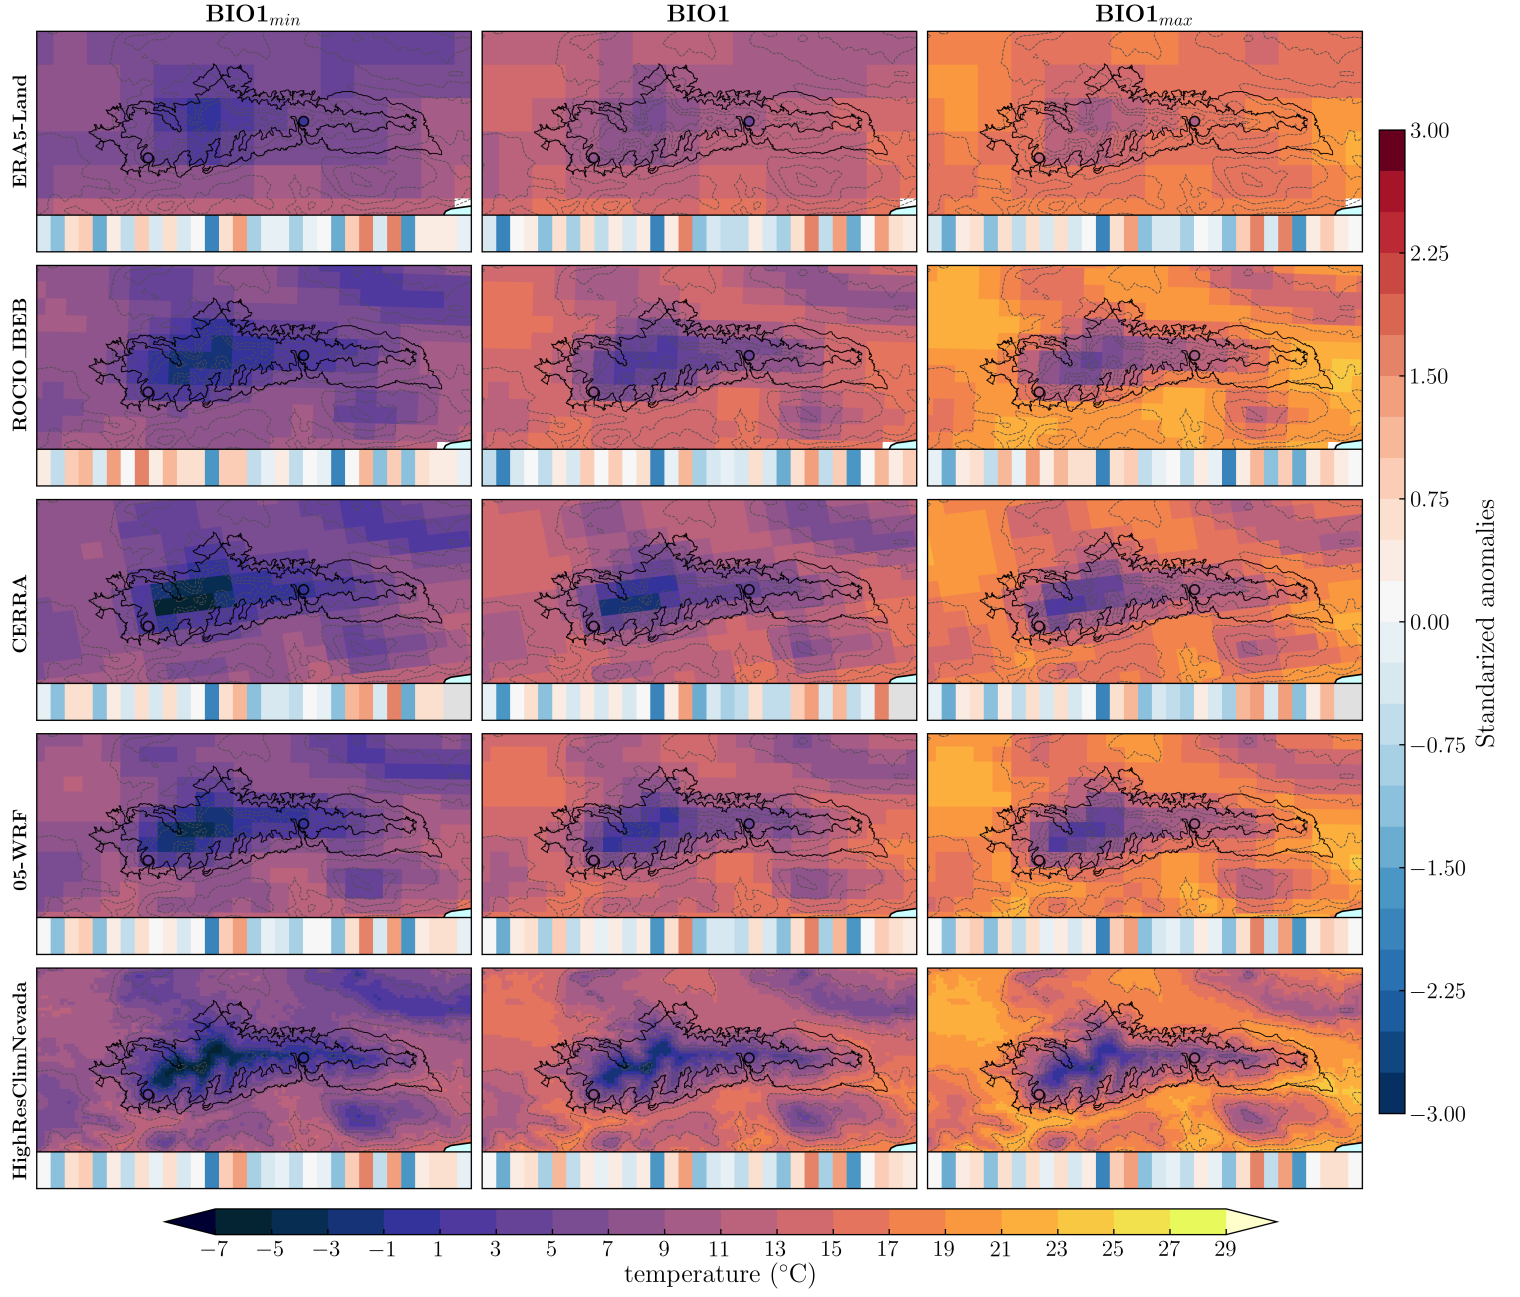

**Fig. S2** Spring mean of the daily (a) maximum (b) mean, and (c) minimum temperatures (tasmax, tas, and tasmin). The annual standardised anomalies over 2001-2020 are shown below the corresponding spatial map as *warming stripes*.

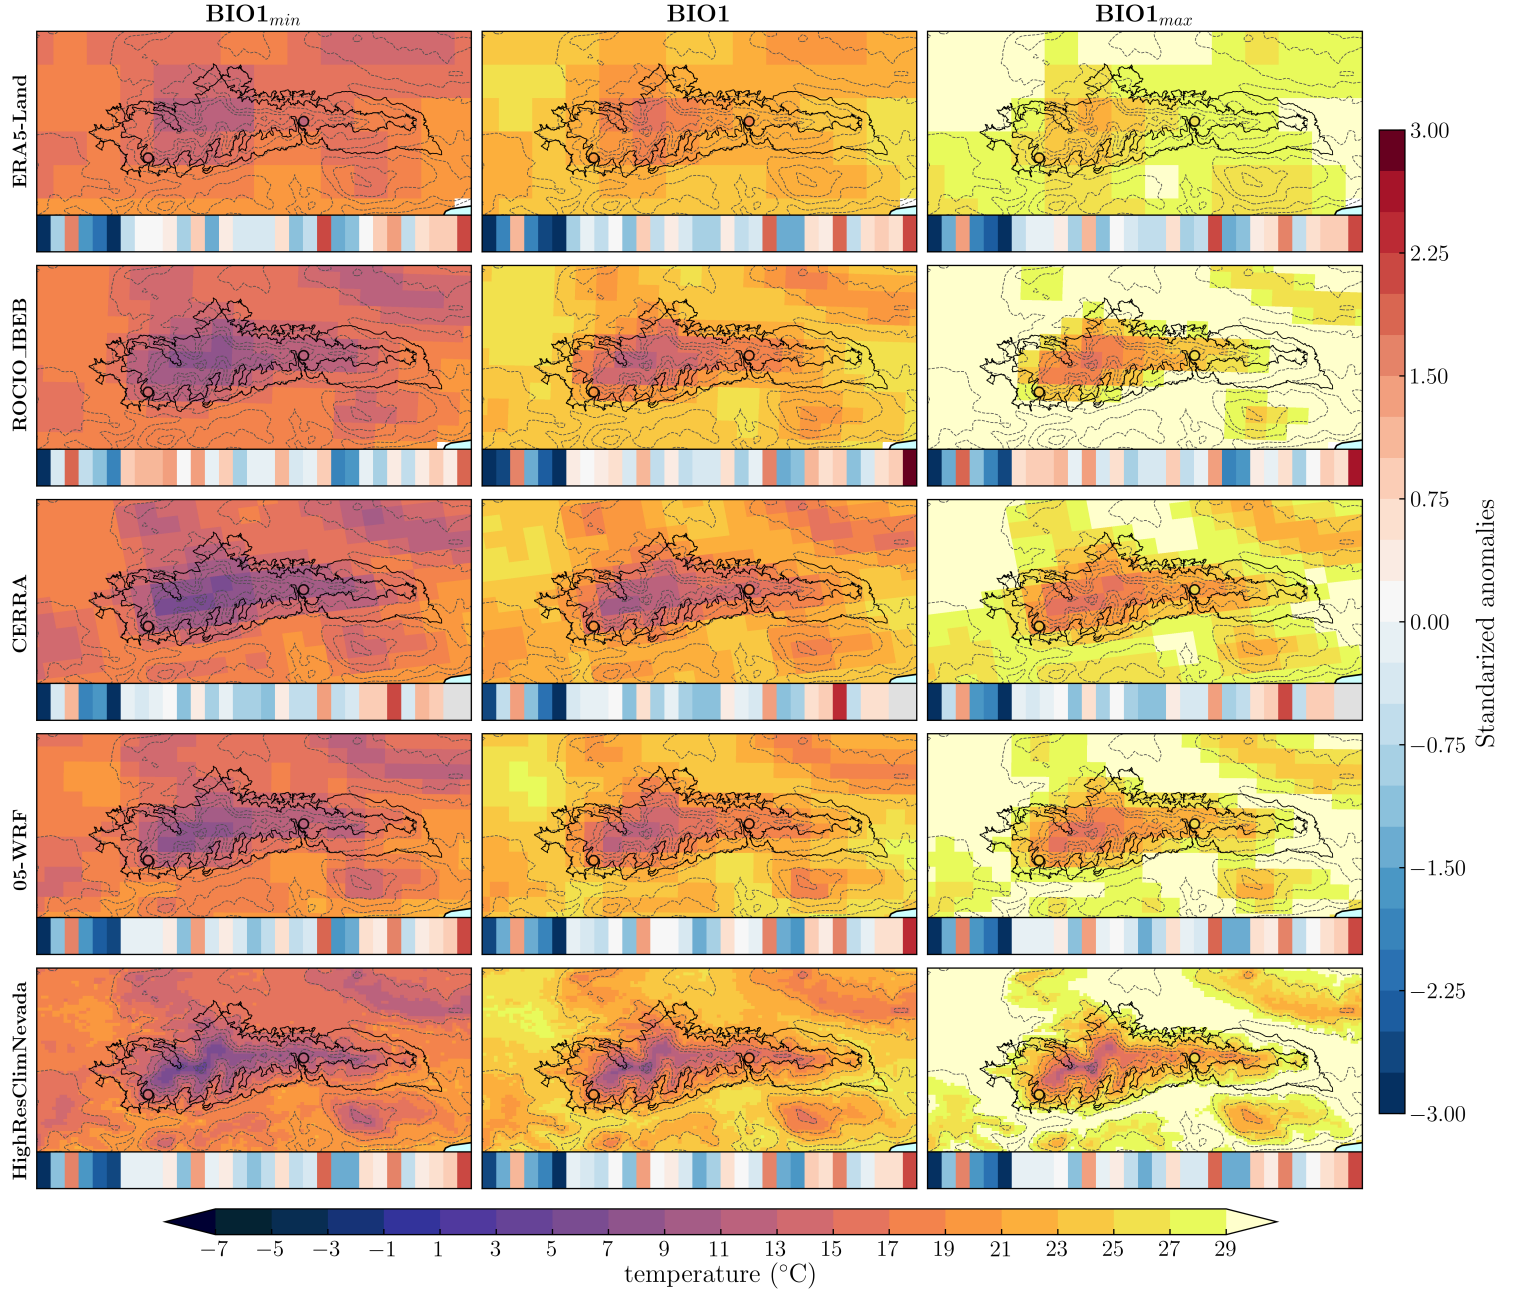

**Fig. S3** Summer mean of the daily (a) maximum (b) mean, and (c) minimum temperatures (tasmax, tas, and tasmin). The annual standardised anomalies over 2001-2020 are shown below the corresponding spatial map as *warming stripes*.



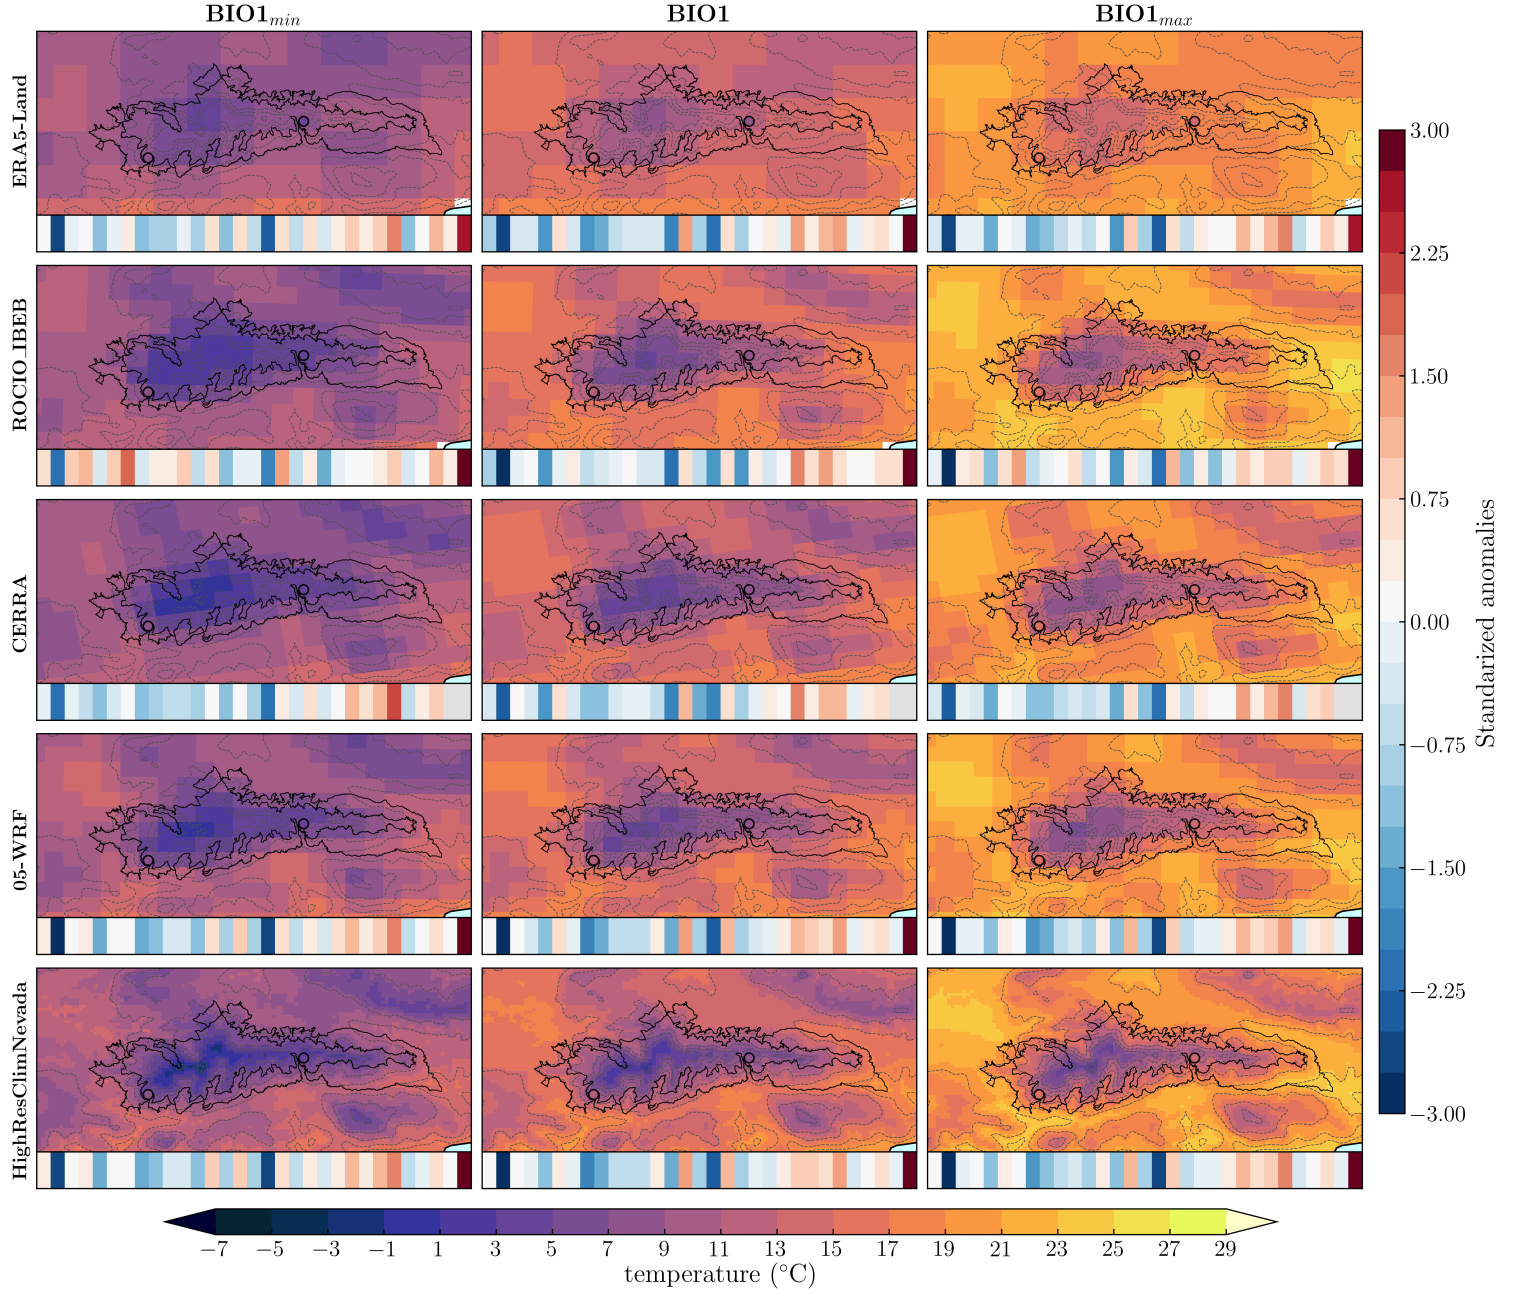

**Fig. S4** Autumn mean of the daily (a) maximum (b) mean, and (c) minimum temperatures (tasmax, tas, and tasmin). The annual standardised anomalies over 2001-2020 are shown below the corresponding spatial map as *warming stripes*.

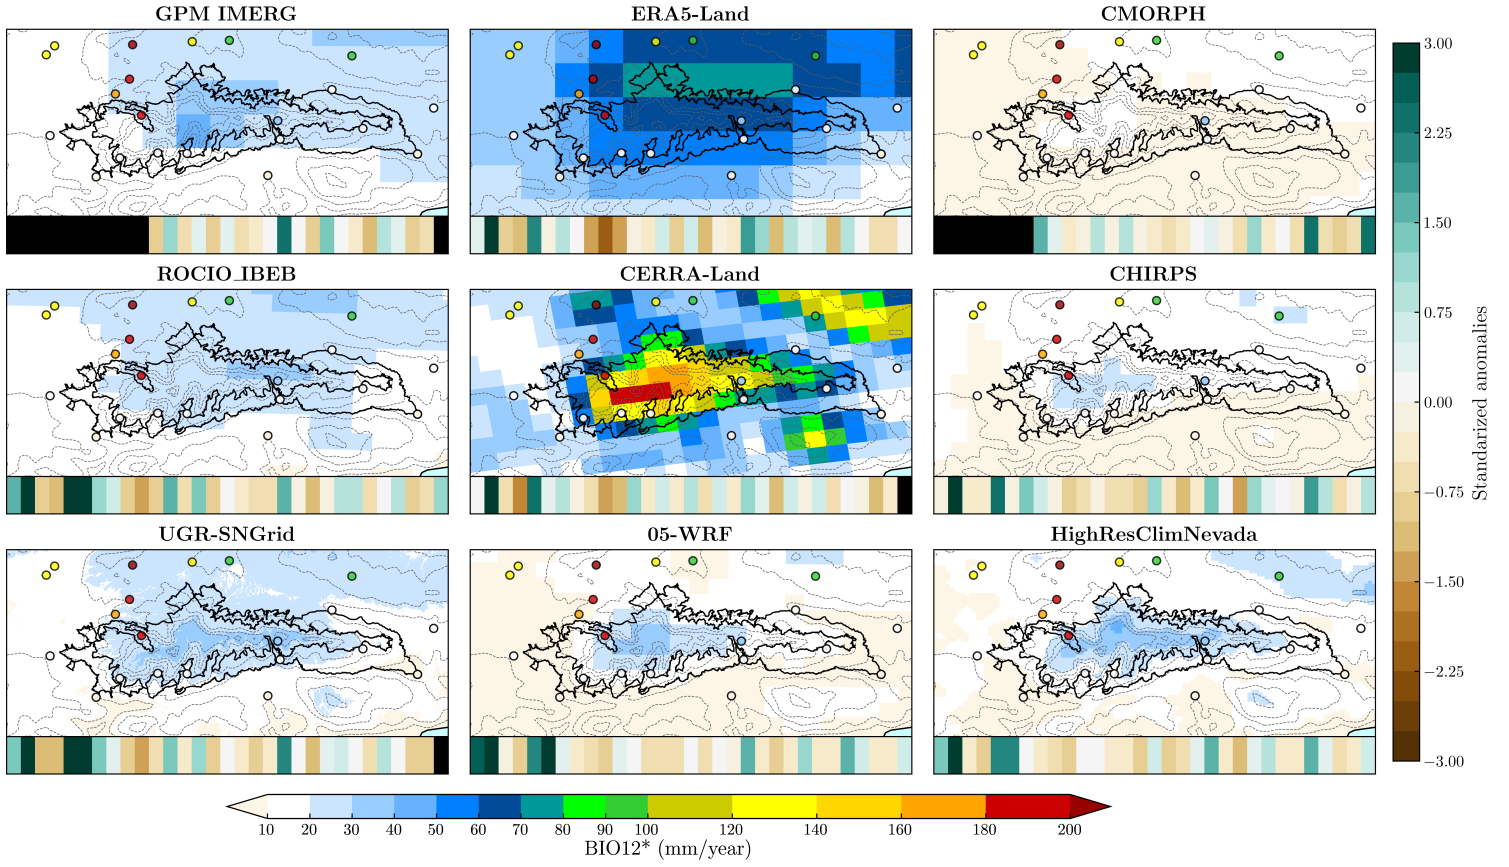

**Fig. S5** Winter (DJF) amount of precipitation (mm) in Sierra Nevada. The annual standardised anomalies over 2001-2020 are shown below the corresponding spatial map as *warming stripes*.

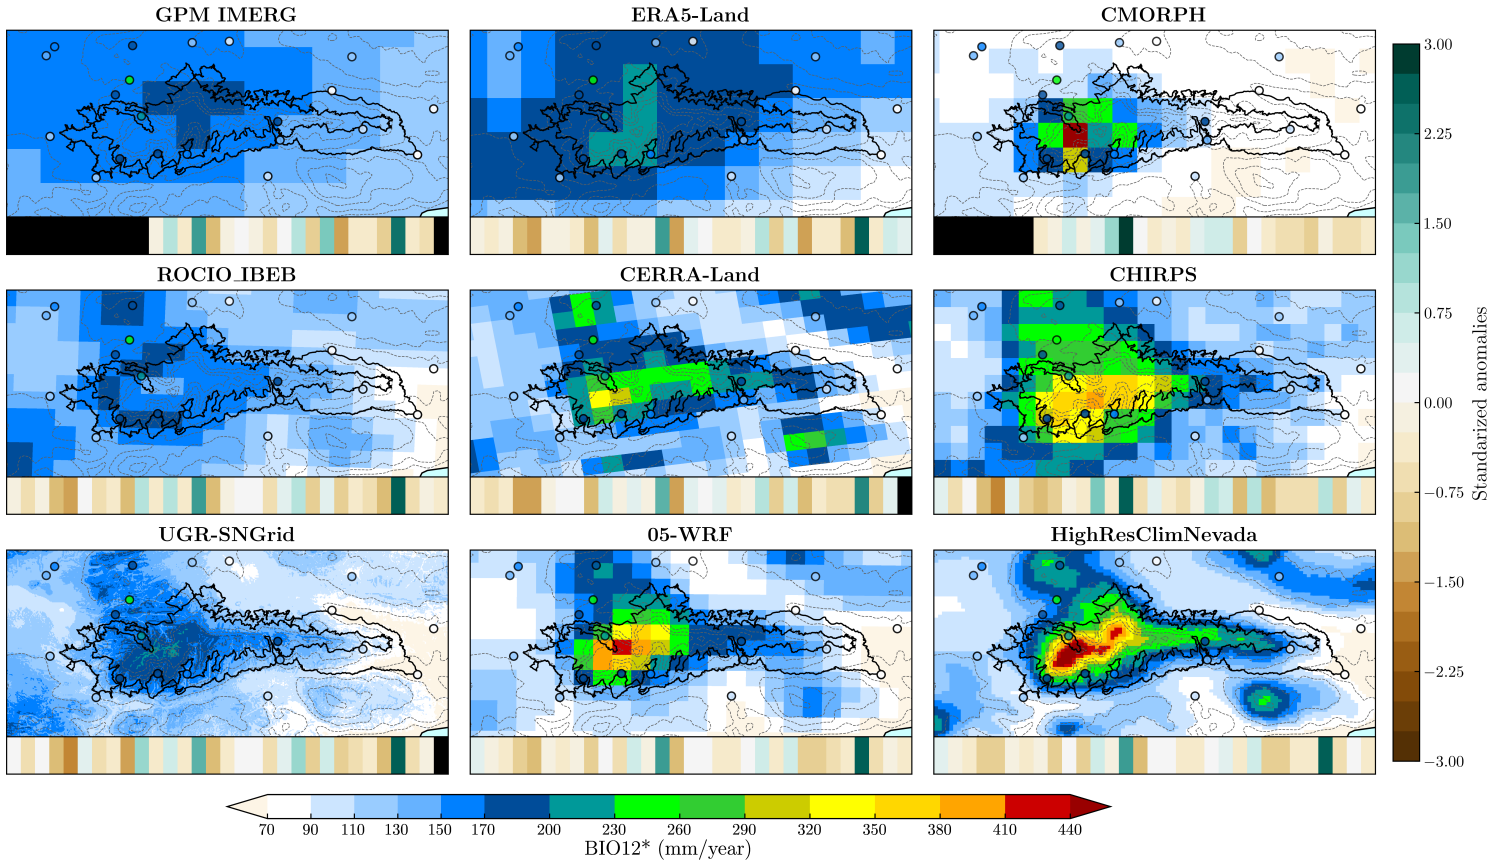

**Fig. S6** Spring (MAM) amount of precipitation (mm) in Sierra Nevada. The annual standardised anomalies over 2001-2020 are shown below the corresponding spatial map as *warming stripes*.



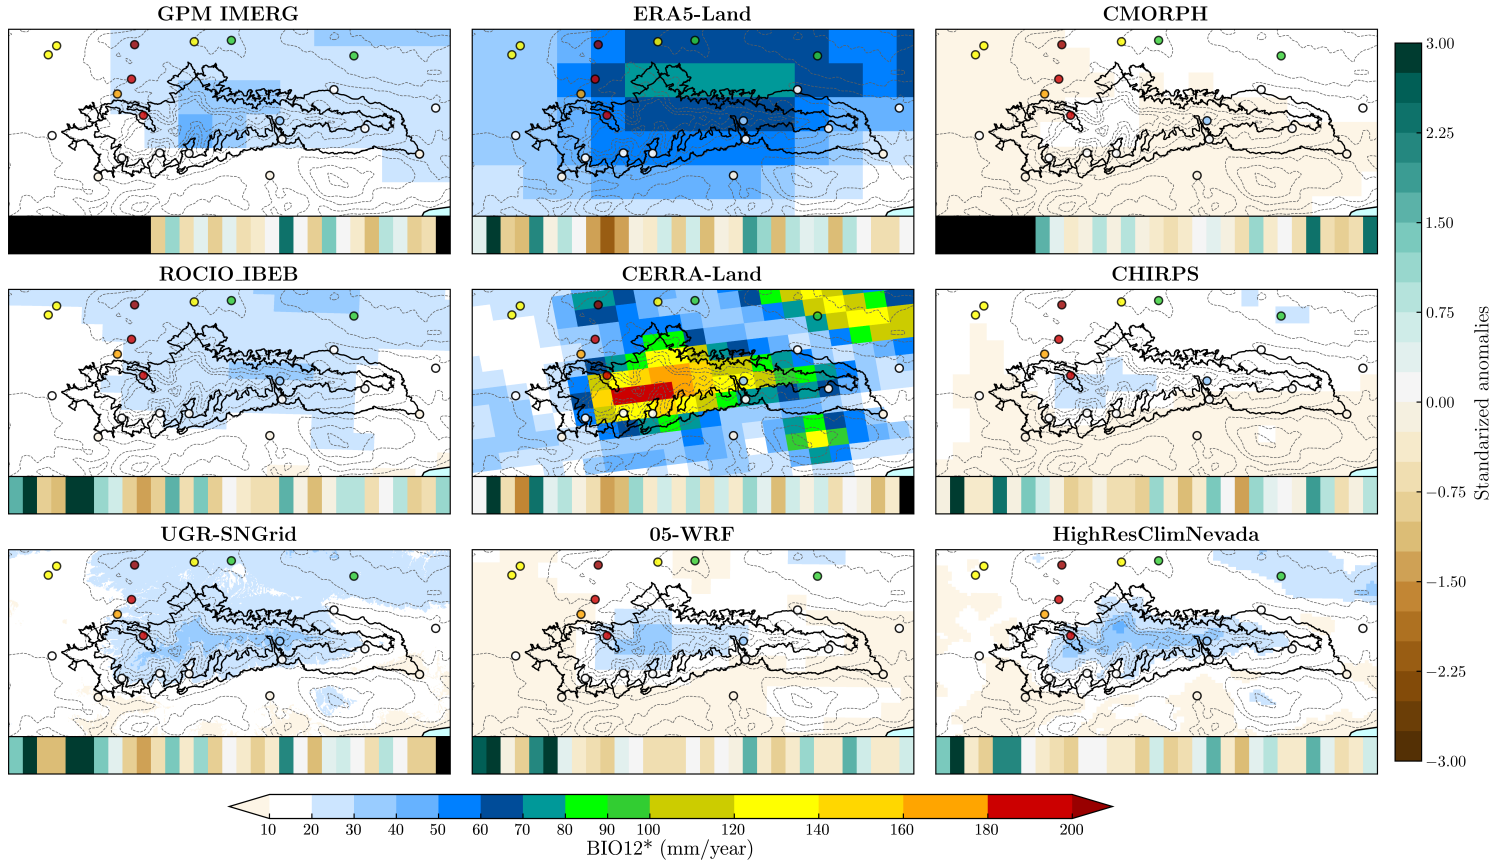

**Fig. S7** Summer (JJA) amount of precipitation (mm) in Sierra Nevada. The annual standardised anomalies over 2001-2020 are shown below the corresponding spatial map as *warming stripes*.

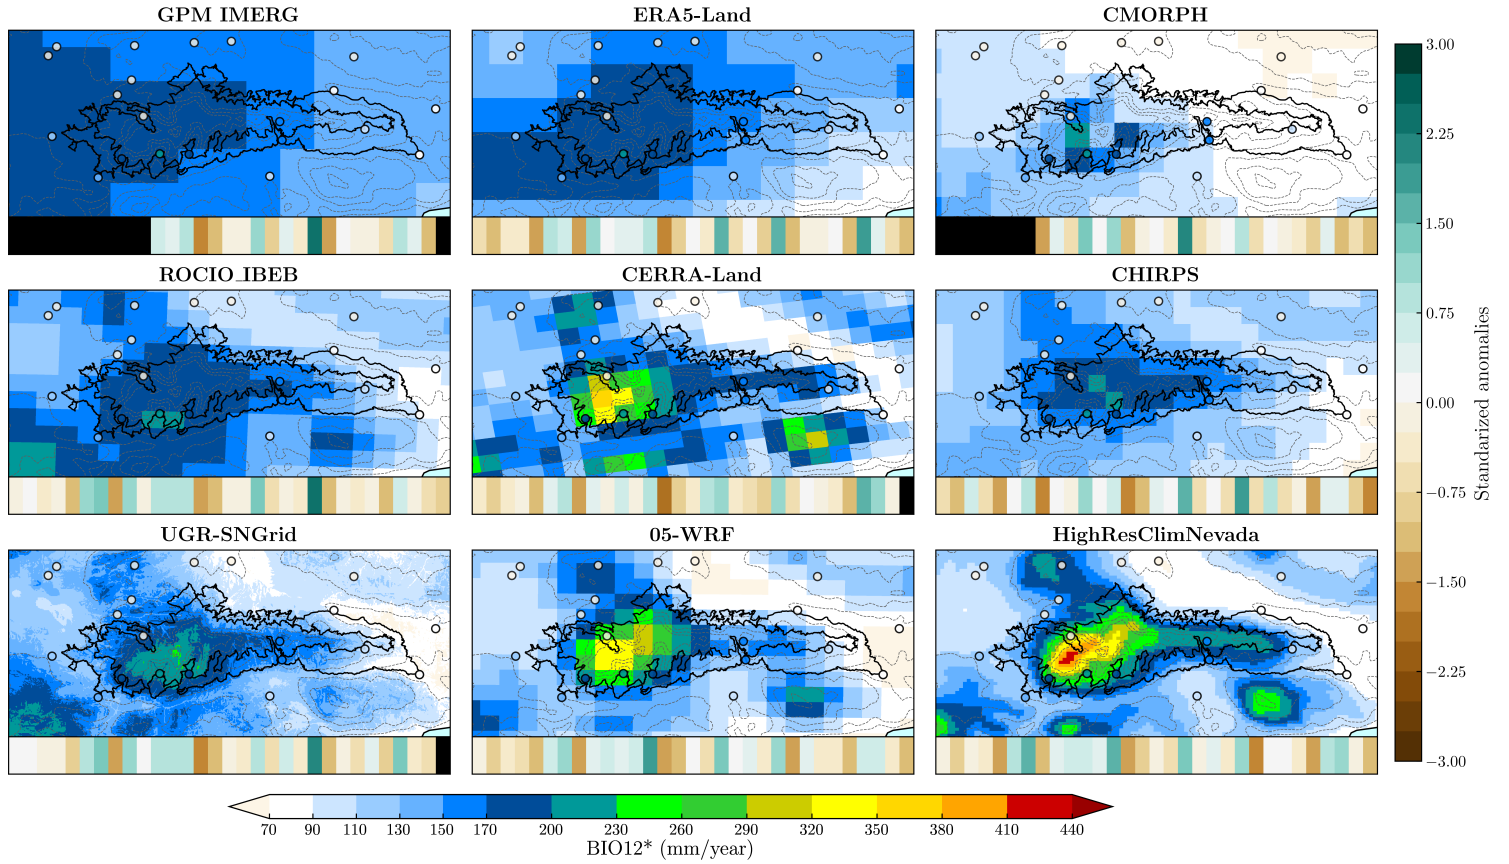

**Fig. S8** Autumn (SON) amount of precipitation (mm) in Sierra Nevada. The annual standardised anomalies over 2001-2020 are shown below the corresponding spatial map as *warming stripes*.
